# Supplementary material for: Ultrahigh photosensitive organic phototransistors by photoelectric dual control
Source: Royal Society of Chemistry journal article supplement (doi:10.1039/c9tc00324j), 2019-01-01
Supplement: c9tc00324j1.pdf [file c9tc00324j1.pdf]

## Supporting Information

### Title

# Ultrahigh Photosensitive Organic Phototransistors by Photoelectric Dual Control

Tao Han<sup>†,‡,§</sup>, Meihua Shou<sup>‡</sup>, Linlin Liu<sup>\*,‡</sup>, Zengqi Xie<sup>‡</sup>, Lei Ying<sup>‡</sup>, Chunzhi Jiang<sup>†</sup>,  
Huanyou Wang<sup>\*,†</sup>, Min Yao<sup>†</sup>, Haiming Deng<sup>†</sup>, Gui Jin<sup>†</sup>, Junwu Chen<sup>‡</sup>, Yuguang Ma<sup>‡</sup>

<sup>†</sup>School of Electronic Information and Electrical Engineering, Xiangnan University, Chenzhou 423000, P. R. China.

<sup>‡</sup>Institute of Polymer Optoelectronic Materials and Devices, State Key Laboratory of Luminescent Materials and Devices, South China University of Technology, Guangzhou 510640, P. R. China.

<sup>§</sup>Fujian Provincial Key Laboratory of Advanced Materials Processing and Application, Fujian University of Technology, Fuzhou 350118, P. R. China.

E-mail: [whyics@163.com](mailto:whyics@163.com), [mliull@scut.edu.cn](mailto:mliull@scut.edu.cn).

### Supplementary Figures

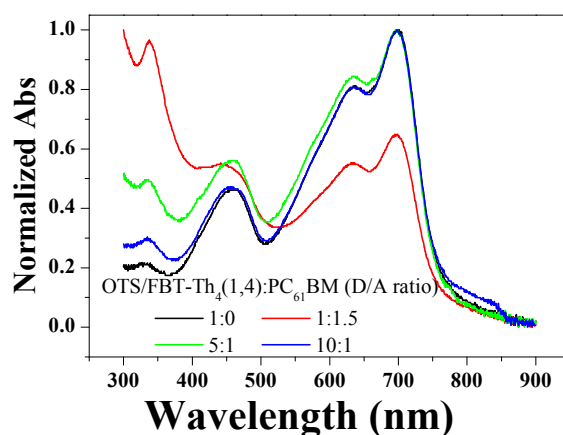

**Figure S1.** Optical extinction spectra of devices doped with different PC<sub>61</sub>BM ratios with Quartz/OTS/FBT-Th<sub>4</sub>(1,4):PC<sub>61</sub>BM (D/A ratio) structure.

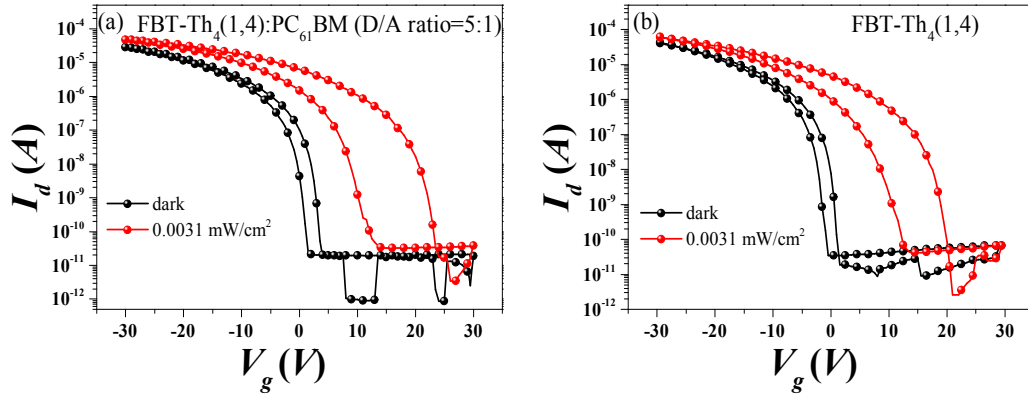

**Figure S2.** The transfer characteristic curves of organic phototransistor in dark and under light. (a) FBT-Th<sub>4</sub>(1,4):PC<sub>61</sub>BM device (Si /SiO<sub>2</sub>/OTS /FBT-Th<sub>4</sub>(1,4):PC<sub>61</sub>BM (D/A ratio = 5:1) (180 nm) /Au electrodes), (b) FBT-Th<sub>4</sub>(1,4) device (Si /SiO<sub>2</sub>/OTS /FBT-Th<sub>4</sub>(1,4) (190 nm) /Au electrodes). Here, the weak light were provided by diode pumped crystal laser with a wavelength of 405 nm.

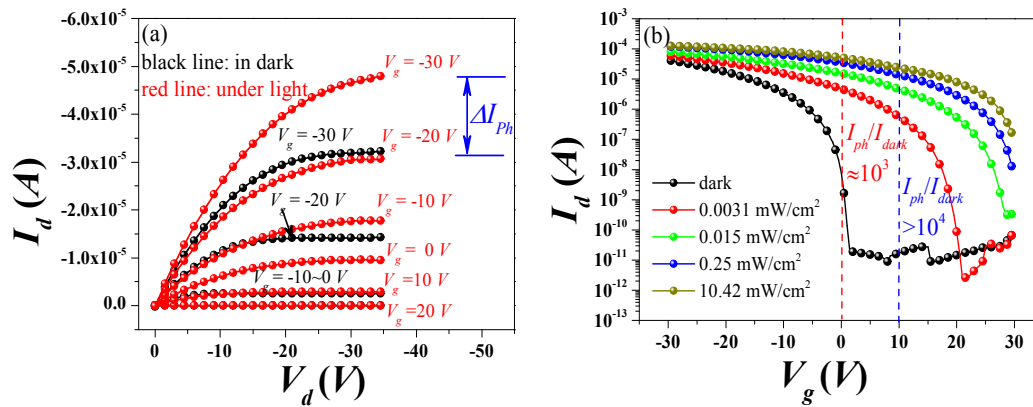

**Figure S3.** (a) the contrastive output characteristic curves of organic phototransistor with Si /SiO<sub>2</sub>/OTS /FBT-Th<sub>4</sub>(1,4) (190 nm) /Au electrodes structure (logogram as the FBT-Th<sub>4</sub>(1,4) device) in the dark and under weak photo-irradiation (0.0031 mW/cm<sup>2</sup>), (b) the transfer  $I$ - $V$  characteristic curves of the FBT-Th<sub>4</sub>(1,4) device in dark and under different light intensity. The different light intensities were provided by diode pumped crystal laser with a wavelength of 405 nm.

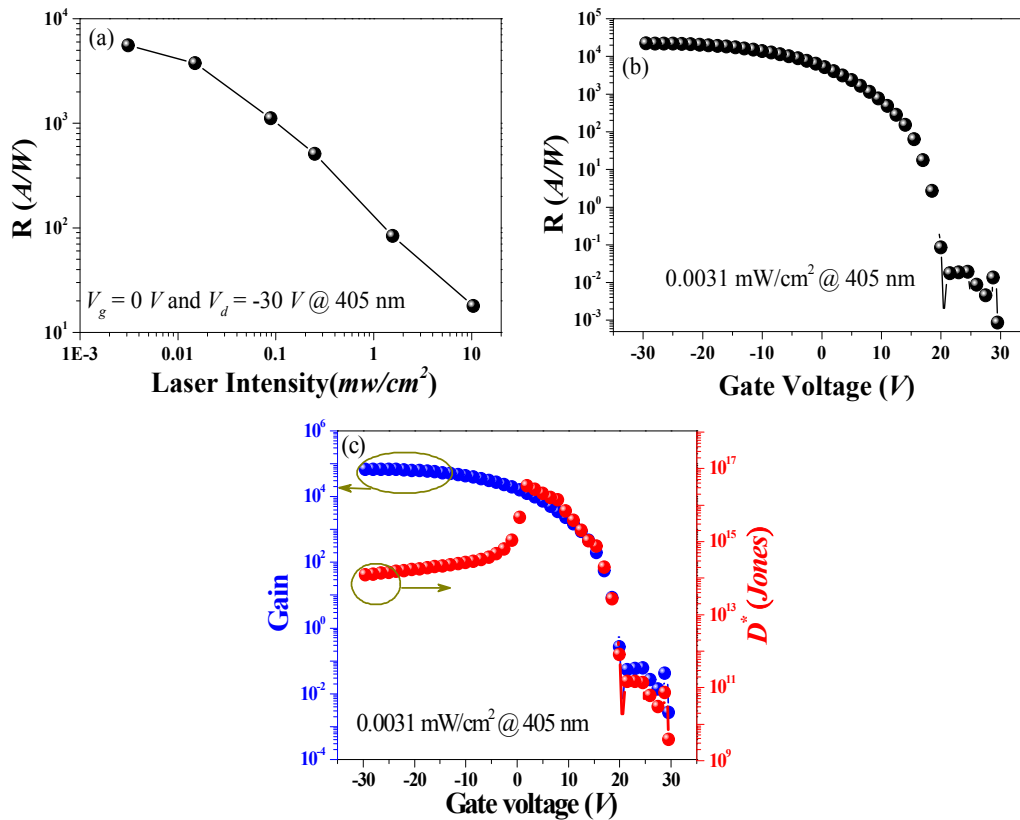

**Figure S4.** The photodetector parameters of OPT Si /SiO<sub>2</sub> /OTS /FBT-Th<sub>4</sub>(1,4) /Au electrodes structure (FBT-Th<sub>4</sub>(1,4) control device): (a) the responsivity dependent on light intensity under  $V_g = 0$  V and  $V_d = -30$  V; (b) the responsivity dependent on gate voltage under  $0.0031$   $\text{mW}/\text{cm}^2$ ; (c) the dependence of the gain and specific detectivity on gate voltage under  $0.0031$   $\text{mW}/\text{cm}^2$ . Here, the different light intensities were provided by diode pumped crystal laser with a wavelength of 405 nm.

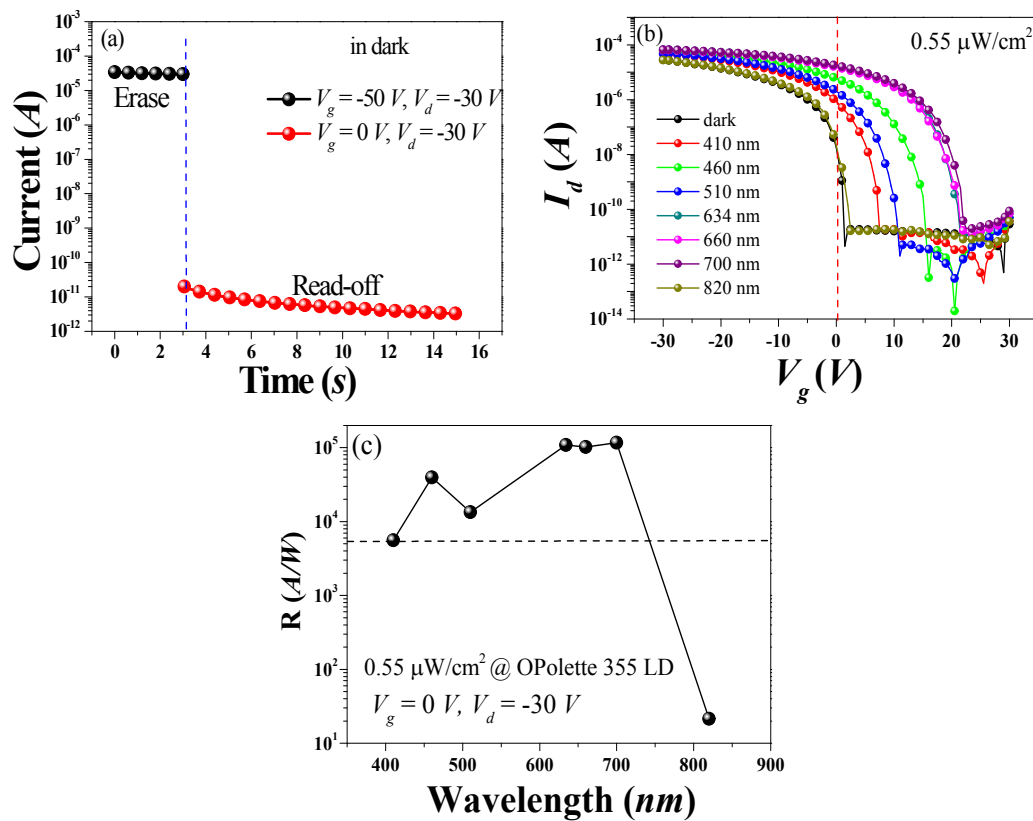

**Figure S5.** (a) Current-time characteristics for device initialization operation processes (erasing and reading (off-state)) based on  $V_d = -30 V$ , the gate voltages for different steps as marked in figures; (b) the transfer  $I$ - $V$  characteristic curves of the FBT- $\text{Th}_4(1,4)$ : $\text{PC}_{61}\text{BM}$  device in dark and under different wavelength light source ( $0.55 \mu\text{W}/\text{cm}^2$ ). (c) the dependence of the responsivity on the wavelength of OPT at  $V_g = 0 V$  and  $V_d = -30 V$  under  $0.55 \mu\text{W}/\text{cm}^2$ . Here, the different light wavelength was provided by a continuous spectrum light source at 20 Hz (Opolette 355 LD). Before test the transfer  $I$ - $V$  characteristic curves under different wavelength light, the current-time characteristics for device initialization operation processes (erasing and reading (off-state)) based on  $V_d = -30 V$  should be executed as shown in Figure S4a.

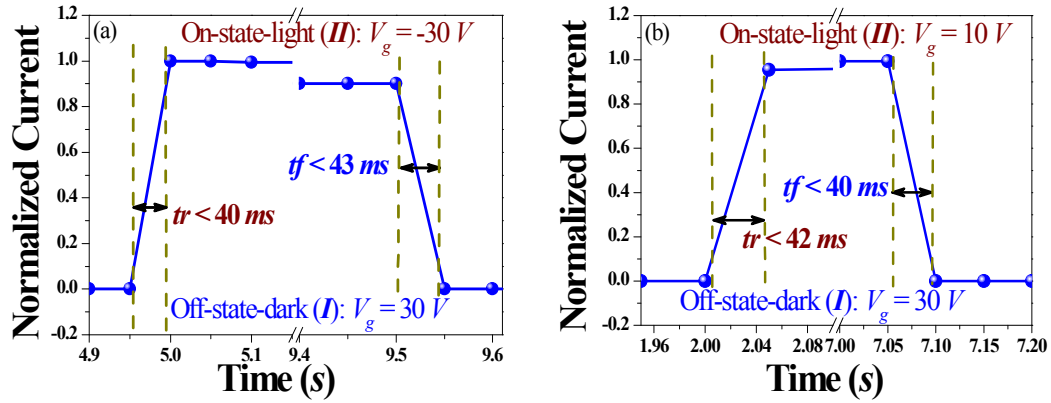

**Figure S6.** Normalized time-current curve of FBT-Th<sub>4</sub>(1,4):PC<sub>61</sub>BM device at constant source drain voltage ( $V_d = -30 V$ ) under light excitation ( $0.0031 \text{ mW/cm}^2$ ). (a) on-state gate voltage (OSGV)  $V_g = -30 V$  and off-state gate voltage  $V_g = 30 V$ ; (b) on-state gate voltage (OSGV)  $V_g = 10 V$  and off-state gate voltage  $V_g = 30 V$ . Here, the weak light were provided by diode pumped crystal laser with a wavelength of 405 nm. The on-state-light (II) means the device work in light with  $V_g = 0 V$  and  $V_d = -30 V$ ; The off-state-dark (I) means the device work in the dark with  $V_g = 30 V$  (or  $10 V$ ) and  $V_d = -30 V$ .

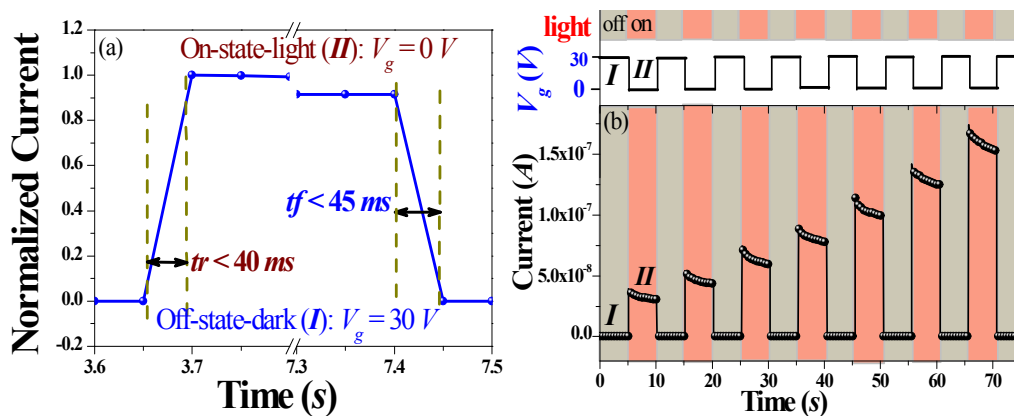

**Figure S7.** (a) normalized time-current curve and (b) current-time curve of FBT-Th<sub>4</sub>(1,4) control device at on-state gate voltage (OSGV)  $V_g = -30 V$  and off-state gate voltage  $V_g = 30 V$  under light excitation ( $0.0031 \text{ mW/cm}^2$ ). Here, the weak light were

provided by diode pumped crystal laser with a wavelength of 405 nm.  $I$  represents the off-state,  $II$  represents the on-state. Synchronous optical programming and gate voltage programming were shown in upper part in Figure S7a,b. The source-drain voltage is maintained at  $V_d = -30 V$  in both  $I$  and  $II$  process throughout the test.
